# Supplementary material for: Directional growth, physicochemical and quantum chemical investigations on pyridinium 2-carboxylate: 4-nitrophenol (P2C4N) single crystal for nonlinear optical (NLO) applications
Source: Royal Society of Chemistry journal article supplement (doi:10.1039/c7nj03928j), 2018-01-01
Supplement: c7nj03928j1.pdf [file c7nj03928j1.pdf]

## **Directional growth, physicochemical and quantum chemical investigations on Pyridinium 2-carboxylate: 4-nitrophenol (P2C4N) single crystal for nonlinear optical (NLO) applications**

**V. Sivasubramani<sup>a</sup>, Jesby George<sup>b</sup>, M. Senthil Pandian<sup>a</sup>, P. Ramasamy<sup>a</sup>, P. Pounraj<sup>a</sup>,**

**K. K. Maurya<sup>c</sup>, D. Sajan<sup>b</sup>**

**<sup>a</sup>SSN Research Centre, SSN College of Engineering, Kalavakkam-603 110, Chennai, Tamilnadu, India**

**<sup>b</sup>Centre for Advanced Functional Materials, Department of Physics, Bishop Moore College, Mavelikara, Alappuzha, Kerala 690 110, India**

**<sup>c</sup>X-ray Analysis and Crystal Growth Section, CSIR- National Physical Laboratory, New Delhi-110 012, India**

### **SUPPLEMENTARY INFORMATION**

#### **1. Determination of linear optical parameters**

The absorption coefficient of the grown crystal was evaluated using optical transmission data by the following equation

$$\alpha = \frac{2.303 \times \log \left( \frac{1}{T} \right)}{t} \text{----- (1)}$$

where 'T' is the percentage of transmittance and 't' is the thickness of the sample (1 mm) which was used in UV-Vis-NIR transmittance analysis. Optical band gap ( $E_g$ ) was evaluated using Tauc's plot relation by the following equation [1]

$$\alpha h\nu = A(h\nu - E_g)^n \text{----- (2)}$$

where ' $E_g$ ' denotes the band gap of the sample, 'A' is a constant, 'h' is Planck's constant, ' $\nu$ ' is the frequency of the incident photon and 'n' is the characteristics of an electronic transition of the given material. In the above relation, if n=1/2 for direct allowed transitions, n=3/2 for direct forbidden transitions, n=2 for indirect allowed transitions and n=3 for indirect forbidden transitions [2].

The reflectance (R) in terms of absorption coefficient can be calculated by the following equation

$$R = \frac{\exp(-\alpha t) \pm \sqrt{\exp(-\alpha t)T - \exp(-3\alpha t)T + \exp(-2\alpha t)T^2}}{\exp(-\alpha t) + \exp(-2\alpha t)T} \text{----- (2)}$$

The refractive index ( $n_0$ ) of the grown crystal was determined by the following equation [3]

$$n_0 = -(R+1) \pm 2 \frac{\sqrt{R}}{(R-1)} \text{----- (3)}$$

The extinction coefficient of the title crystal was determined by the following equation

$$K = \frac{\lambda\alpha}{4\pi} \text{----- (4)}$$

## 2. Determination of third-order nonlinear optical (NLO) parameters

The Rayleigh diffraction length ( $Z_R$ ) of laser beam was calculated by the following equation [4]

$$Z_R = \frac{K\omega_0^2}{2} \text{----- (5)}$$

where, ‘K’ denotes the wavevector ( $K=2\pi/\lambda$ ) and ‘ $\omega_0$ ’ is the beam waist at the focal point.

The beam waist ( $\omega_0$ ) of the laser source can be calculated by the following equation [4]

$$\omega_0 = \frac{f\lambda}{D} \text{----- (6)}$$

where, ‘f’ denotes the focal length of the lens, ‘ $\lambda$ ’ is the wavelength of the source and ‘D’ is the beam radius at the lens. In order to determine the nonlinear refractive index ( $n_2$ ), the difference between normalized peak and valley transmittance ( $\Delta T_{p-v}$ ) from the closed aperture (Fig.13b) can be calculated in terms of axis phase shift ( $|\Delta\phi|$ ) at the focus by the following equation [5]

$$|\Delta\phi| = \frac{\Delta T_{p-v}}{0.406(1-S)^{0.25}} \text{----- (7)}$$

where, ‘S’ is the linear transmittance of the aperture and it is calculated using the following relation

$$S = 1 - \exp\left(\frac{-2r_a^2}{\omega_a^2}\right) \text{-----} (8)$$

where ‘ $r_a$ ’ denotes the radius of the aperture and ‘ $\omega_a$ ’ denotes the beam radius at the aperture. The third-order nonlinear refractive index ( $n_2$ ) of the grown crystal was determined by the following relation

$$n_2 = \frac{\Delta\Phi_0}{KI_0L_{eff}} \text{-----} (9)$$

where,  $K = \frac{2\pi}{\lambda}$ , ‘ $L_{eff}$ ’ is the effective thickness of the sample and ‘ $I_0$ ’ is the intensity of the laser beam at the focal point. The effective thickness ‘ $L_{eff}$ ’ can be calculated by the following relation

$$L_{eff} = \frac{[1 - \exp(-\alpha L)]}{\alpha} \text{-----} (10)$$

where ‘ $\alpha$ ’ is the linear absorption coefficient and it was obtained by UV-Vis-NIR transmittance analysis and ‘L’ denotes the thickness of the crystal which is used for the UV-Vis-NIR analysis. From OP curve (Fig. 13a), the nonlinear refractive index of absorption coefficient ( $\beta$ ) can be calculated using the following relation [4]

$$\beta = \frac{2\sqrt{2} \Delta T}{I_0 L_{eff}} \text{-----} (11)$$

where ‘ $\Delta T$ ’ is normalized peak transmittance in the open aperture curve ( $Z=0$ ). Based on the results, the real and imaginary parts of the third-order nonlinear optical susceptibility can be calculated by the following relations [6]

$$\text{Re } \chi^{(3)} \text{ (esu)} = \frac{10^{-4} (\epsilon_0 C^2 n_0^2 n_2)}{\pi} \left( \frac{cm^2}{W} \right) \text{----- (12)}$$

$$\text{Im } \chi^{(3)} \text{ (esu)} = \frac{10^{-2} (\epsilon_0 C^2 n_0 \lambda \beta)}{4\pi^2} \left( \frac{cm}{W} \right) \text{----- (13)}$$

where, ‘ $\epsilon_0$ ’ denotes the vacuum permittivity ( $8.851 \times 10^{-12}$  F/m), ‘C’ denotes the velocity of light in vacuum ( $3 \times 10^8$  m/s) and ‘ $n_0$ ’ denotes the linear refractive index of P2C4N crystal. The  $n_0$  was calculated from UV-Vis-NIR analysis at 632 nm and it was found to be 1.35. The absolute third-order nonlinear susceptibility of the title crystal can be calculated by the following relation.

$$|\chi^{(3)}| = [(\text{Re}(\chi^{(3)}))^2 + (\text{Im}(\chi^{(3)}))^2]^{1/2} \text{ esu} \text{----- (14)}$$

Further, the second-order hyperpolarizability ( $\gamma$ ) of the title crystal was estimated by the following equation [6]

$$\text{Re } [\gamma] = \frac{\text{Re} (\chi^{(3)})}{Nf^4} \text{----- (15)}$$

where, ‘N’ is the number of molecules per unit volume and it can be obtained by the following equation

$$N = \frac{\rho^* (N_A)}{M} \text{----- (16)}$$

where ‘ $(\rho^*)$ ’ denotes the density of P2C4N crystal, ‘ $N_A$ ’ denotes the Avogadro number and ‘M’ denotes the molecular weight. The local field correction factor (f) can be obtained from the following equation

$$f = \frac{(n_0^2 + 2)}{3} \text{----- (17)}$$

where, 'n<sub>0</sub>' denotes the linear refractive index of the grown crystal and it was calculated by the UV-Vis-NIR analysis. The coupling factor can be determined by the ratio of the imaginary and real part of the third-order susceptibility of the grown crystal [7]

$$\rho^* = \text{Im}(\chi^{(3)}) / \text{Re}(\chi^{(3)}) \text{-----} (18)$$

In order to know the suitability of the grown crystal for optical switching applications, two figure of merit were evaluated using the following equations [8]

$$W = n_2 I_0 / \alpha \lambda \text{-----} (19)$$

$$T = \beta \lambda / n_2 \text{-----} (20)$$

where, 'n<sub>2</sub>' is nonlinear refractive index, 'I<sub>0</sub>' is the intensity of the laser beam (I<sub>0</sub>=26.31 MW/m<sup>2</sup>), 'α' is linear absorption coefficient, 'λ' is wavelength of laser source and 'β' is nonlinear absorption coefficient.

## References

1. J. Dalal, N. Sinha, H. Yadav and B. Kumar, *RSC Adv.*, 2015, 5, 57735-57748.
2. N. Sudharsana, V. Krishnakumar and R. Nagalakshmi, *Journal of Crystal Growth*, 2014, 398, 45-57.
3. G. Anandha Babu and P. Ramasamy, *Materials Chemistry and Physics*, 2009, 113, 727-733.
4. K. Senthil, S. Kalainathan, A. Kumar and P. Aravindan, *RSC Adv.*, 2014, 4, 56112-56127.
5. C. Vesta, R. Uthrakumar, G. Vinitha, A. Ramalingam and S. Jerome Das, *Journal of Crystal Growth*, 2009, 311, 4016-4021.
6. K. Senthil, S. Kalainathan, Y. Kondo, F. Hamada and M. Yamada, *Optics & Laser Technology*, 2017, 90, 242-251.
7. K. Naseema, M. Shyma, K. Manjunatha, A. Muralidharan, G. Umesh and V. Rao, *Optics & Laser Technology*, 2011, 43, 1286-1291.

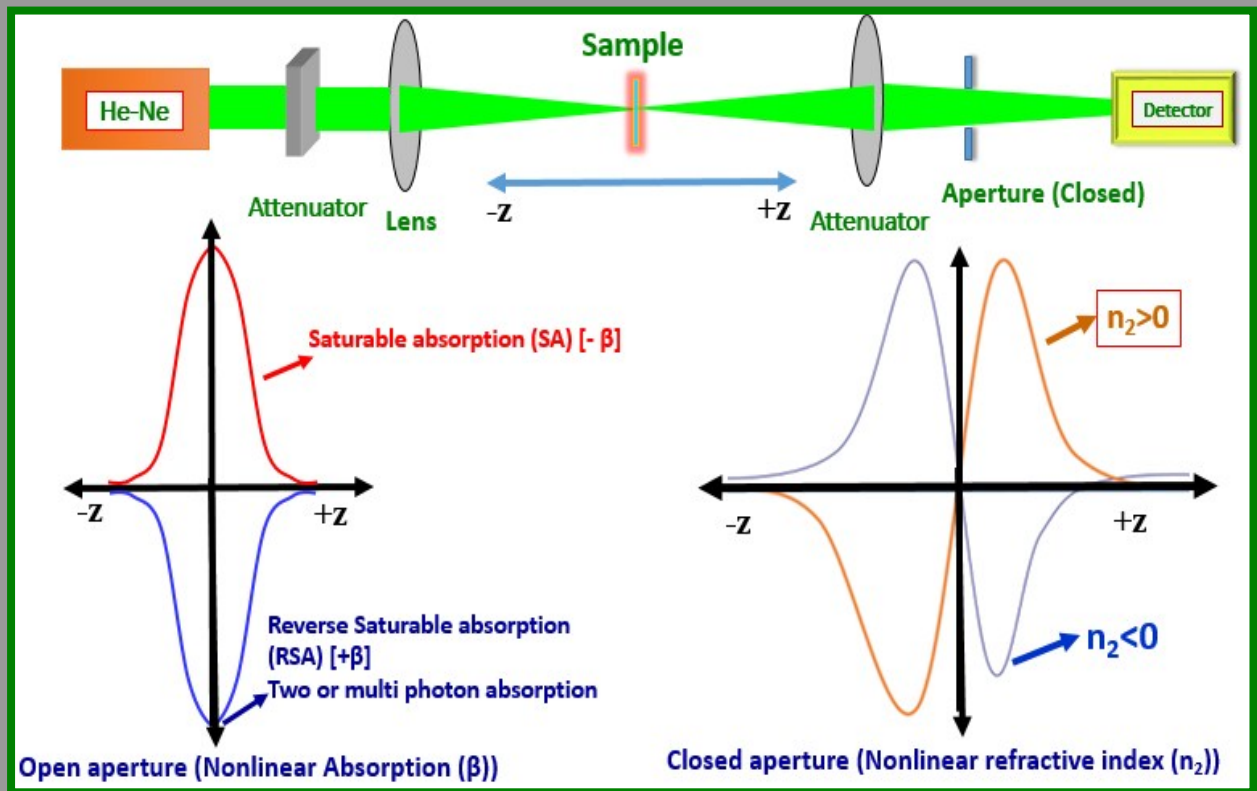

Fig.S1. Z-scan experimental setup

| S. No | Temperature at top portion (°C) | Temperature at bottom portion (°C) | Growth observations (Solvent-Methanol)                                     | Growth rate                                                      |
|-------|---------------------------------|------------------------------------|----------------------------------------------------------------------------|------------------------------------------------------------------|
| 1     | 37                              | 34                                 | Multi-nucleation was formed at top of the glass ampoule                    | Crystal growth is not possible                                   |
| 2     | 36                              | 34                                 | Poor quality crystal                                                       | Growth rate is above ~3 mm/day                                   |
| 3     | 35                              | 35                                 | (Multi nucleation was effectively controlled)<br><br>Good quality crystals | Optimized growth rate is ~3 mm/day<br>(Growth period is 60 days) |

**Table.S1. Growth observation of unidirectional SR method grown P2C4N crystal**

| Bond length(Å)                   | XRD    | B3LYP/<br>cc-<br>pVTZ | Bond angle (°)                                   | XRD      | B3LYP/<br>cc-pVTZ | Dihedral angle (°)                                                | XRD      | B3LYP/<br>cc-pVTZ |
|----------------------------------|--------|-----------------------|--------------------------------------------------|----------|-------------------|-------------------------------------------------------------------|----------|-------------------|
| C <sub>1</sub> -C <sub>8</sub>   | 1.3673 | 1.3838                | C <sub>8</sub> -C <sub>1</sub> -C <sub>10</sub>  | 124.8498 | 128.3031          | C <sub>10</sub> -C <sub>1</sub> -C <sub>8</sub> -C <sub>6</sub>   | 179.957  | -180.01           |
| C <sub>1</sub> -C <sub>10</sub>  | 1.5155 | 1.5441                | C <sub>8</sub> -C <sub>1</sub> -N <sub>11</sub>  | 118.3769 | 118.9879          | C <sub>10</sub> -C <sub>1</sub> -C <sub>8</sub> -H <sub>9</sub>   | -0.0295  | -0.0092           |
| C <sub>1</sub> -N <sub>11</sub>  | 1.3350 | 1.3388                | C <sub>10</sub> -C <sub>1</sub> -N <sub>11</sub> | 116.7710 | 112.709           | N <sub>11</sub> -C <sub>1</sub> -C <sub>8</sub> -C <sub>6</sub>   | 0.5140   | -0.0028           |
| C <sub>2</sub> -H <sub>3</sub>   | 0.9299 | 1.0792                | H <sub>3</sub> -C <sub>2</sub> -C <sub>4</sub>   | 120.1254 | 123.962           | N <sub>11</sub> -C <sub>1</sub> -C <sub>8</sub> -H <sub>9</sub>   | -179.472 | 179.9975          |
| C <sub>2</sub> -C <sub>4</sub>   | 1.3625 | 1.3778                | H <sub>3</sub> -C <sub>2</sub> -N <sub>11</sub>  | 120.0949 | 117.3405          | C <sub>8</sub> -C <sub>1</sub> -C <sub>10</sub> -O <sub>12</sub>  | 178.590  | 180.0131          |
| C <sub>2</sub> -N <sub>11</sub>  | 1.3350 | 1.3401                | C <sub>4</sub> -C <sub>2</sub> -N <sub>11</sub>  | 119.7796 | 118.6975          | C <sub>8</sub> -C <sub>1</sub> -C <sub>10</sub> -O <sub>13</sub>  | -2.9456  | 0.015             |
| C <sub>4</sub> -H <sub>5</sub>   | 0.9295 | 1.0792                | C <sub>2</sub> -C <sub>4</sub> -H <sub>5</sub>   | 120.4433 | 119.6798          | N <sub>11</sub> -C <sub>1</sub> -C <sub>10</sub> -O <sub>12</sub> | -1.9580  | 0.0068            |
| C <sub>4</sub> -C <sub>6</sub>   | 1.3635 | 1.397                 | C <sub>2</sub> -C <sub>4</sub> -C <sub>6</sub>   | 119.0821 | 119.0252          | N <sub>11</sub> -C <sub>1</sub> -C <sub>10</sub> -O <sub>13</sub> | 176.505  | 180.0086          |
| C <sub>6</sub> -H <sub>7</sub>   | 0.9302 | 1.0816                | H <sub>5</sub> -C <sub>4</sub> -C <sub>6</sub>   | 120.4744 | 121.295           | C <sub>8</sub> -C <sub>1</sub> -N <sub>11</sub> -C <sub>2</sub>   | -0.5953  | 0.0015            |
| C <sub>6</sub> -C <sub>8</sub>   | 1.3800 | 1.3877                | C <sub>4</sub> -C <sub>6</sub> -H <sub>7</sub>   | 120.0556 | 119.5774          | C <sub>8</sub> -C <sub>1</sub> -N <sub>11</sub> -H <sub>14</sub>  | -0.5953  | -180.003          |
| C <sub>8</sub> -H <sub>9</sub>   | 0.9305 | 1.0795                | C <sub>4</sub> -C <sub>6</sub> -C <sub>8</sub>   | 119.8945 | 120.3121          | C <sub>10</sub> -C <sub>1</sub> -N <sub>11</sub> -C <sub>2</sub>  | 179.916  | 180.0072          |
| C <sub>10</sub> -O <sub>12</sub> | 1.2329 | 1.2441                | H <sub>7</sub> -C <sub>6</sub> -C <sub>8</sub>   | 120.0497 | 120.1105          | C <sub>10</sub> -C <sub>1</sub> -N <sub>11</sub> -H <sub>14</sub> | 3.4454   | 0.0031            |
| C <sub>10</sub> -O <sub>13</sub> | 1.2352 | 1.2404                | C <sub>1</sub> -C <sub>8</sub> -C <sub>6</sub>   | 119.8384 | 118.7051          | H <sub>3</sub> -C <sub>2</sub> -C <sub>4</sub> -H <sub>5</sub>    | 0.7226   | -0.0021           |
| N <sub>11</sub> -H <sub>14</sub> | 0.8669 | 1.0352                | C <sub>1</sub> -C <sub>8</sub> -H <sub>9</sub>   | 120.0951 | 118.2175          | H <sub>3</sub> -C <sub>2</sub> -C <sub>4</sub> -C <sub>6</sub>    | -179.298 | -180.003          |
| O <sub>13</sub> -H <sub>29</sub> | 1.7732 | 1.7189                | C <sub>6</sub> -C <sub>8</sub> -H <sub>9</sub>   | 120.0664 | 123.0774          | N <sub>11</sub> -C <sub>2</sub> -C <sub>4</sub> -H <sub>5</sub>   | -179.267 | -180.001          |
| C <sub>15</sub> -C <sub>16</sub> | 1.3934 | 1.4041                | C <sub>1</sub> -C <sub>10</sub> -O <sub>12</sub> | 116.6164 | 112.2723          | N <sub>11</sub> -C <sub>2</sub> -C <sub>4</sub> -C <sub>6</sub>   | 0.7108   | -0.0018           |

|                                  |        |        |                                                       |          |          |                                                                    |          |          |
|----------------------------------|--------|--------|-------------------------------------------------------|----------|----------|--------------------------------------------------------------------|----------|----------|
| C <sub>15</sub> -C <sub>23</sub> | 1.3904 | 1.4043 | C <sub>1</sub> -C <sub>10</sub> -O <sub>13</sub>      | 115.8770 | 114.7467 | H <sub>3</sub> -C <sub>2</sub> -N <sub>11</sub> -C <sub>1</sub>    | 179.989  | 180.0017 |
| C <sub>15</sub> -O <sub>26</sub> | 1.3362 | 1.3369 | O <sub>12</sub> -C <sub>10</sub> -O <sub>13</sub>     | 127.4855 | 132.981  | H <sub>3</sub> -C <sub>2</sub> -N <sub>11</sub> -H <sub>14</sub>   | -3.5025  | 0.0064   |
| C <sub>16</sub> -H <sub>17</sub> | 0.9299 | 1.0808 | C <sub>1</sub> -N <sub>11</sub> -C <sub>2</sub>       | 123.0216 | 124.2722 | C <sub>4</sub> -C <sub>2</sub> -N <sub>11</sub> -C <sub>1</sub>    | -0.0203  | 0.0009   |
| C <sub>16</sub> -C <sub>18</sub> | 1.3678 | 1.379  | C <sub>1</sub> -N <sub>11</sub> -H <sub>14</sub>      | 119.0020 | 109.6662 | C <sub>4</sub> -C <sub>2</sub> -N <sub>11</sub> -H <sub>14</sub>   | 176.487  | 180.0056 |
| C <sub>18</sub> -H <sub>19</sub> | 0.9299 | 1.0788 | C <sub>2</sub> -N <sub>11</sub> -H <sub>14</sub>      | 117.8861 | 126.0616 | C <sub>2</sub> -C <sub>4</sub> -C <sub>6</sub> -H <sub>7</sub>     | 179.2051 | 179.9987 |
| C <sub>18</sub> -C <sub>20</sub> | 1.3794 | 1.3929 | C <sub>10</sub> -O <sub>13</sub> -H <sub>29</sub>     | 117.8950 | 127.3267 | C <sub>2</sub> -C <sub>4</sub> -C <sub>6</sub> -C <sub>8</sub>     | -0.7725  | 0.0004   |
| C <sub>20</sub> -C <sub>21</sub> | 1.3812 | 1.3915 | C <sub>16</sub> -C <sub>15</sub> -C <sub>23</sub>     | 119.2379 | 119.4638 | H <sub>5</sub> -C <sub>4</sub> -C <sub>6</sub> -H <sub>7</sub>     | -0.8163  | -0.0019  |
| C <sub>20</sub> -N <sub>25</sub> | 1.4482 | 1.4568 | C <sub>16</sub> -C <sub>15</sub> -O <sub>26</sub>     | 117.5051 | 117.4851 | H <sub>5</sub> -C <sub>4</sub> -C <sub>6</sub> -C <sub>8</sub>     | 179.206  | 179.9998 |
| C <sub>21</sub> -H <sub>22</sub> | 0.9298 | 1.0789 | C <sub>23</sub> -C <sub>15</sub> -O <sub>26</sub>     | 123.2501 | 123.0511 | C <sub>4</sub> -C <sub>6</sub> -C <sub>8</sub> -C <sub>1</sub>     | 0.1616   | 0.0019   |
| C <sub>21</sub> -C <sub>23</sub> | 1.3705 | 1.3817 | C <sub>15</sub> -C <sub>16</sub> -H <sub>17</sub>     | 119.7136 | 118.5331 | C <sub>4</sub> -C <sub>6</sub> -C <sub>8</sub> -H <sub>9</sub>     | -179.851 | -179.998 |
| C <sub>23</sub> -H <sub>24</sub> | 0.9295 | 1.0818 | C <sub>15</sub> -C <sub>16</sub> -C <sub>18</sub>     | 120.5756 | 120.4723 | H <sub>7</sub> -C <sub>6</sub> -C <sub>8</sub> -C <sub>1</sub>     | -179.815 | 180.0036 |
| N <sub>25</sub> -O <sub>27</sub> | 1.2223 | 1.2275 | H <sub>17</sub> -C <sub>16</sub> -C <sub>18</sub>     | 119.7106 | 120.9946 | H <sub>7</sub> -C <sub>6</sub> -C <sub>8</sub> -H <sub>9</sub>     | 0.1707   | 0.0033   |
| N <sub>25</sub> -O <sub>28</sub> | 1.2250 | 1.2276 | C <sub>16</sub> -C <sub>18</sub> -H <sub>19</sub>     | 120.3380 | 121.3076 | C <sub>1</sub> -C <sub>10</sub> -O <sub>13</sub> -H <sub>29</sub>  | 171.736  | 180.0116 |
| O <sub>26</sub> -H <sub>29</sub> | 0.8384 | 0.9881 | C <sub>16</sub> -C <sub>18</sub> -C <sub>20</sub>     | 119.2414 | 119.399  | O <sub>12</sub> -C <sub>10</sub> -O <sub>13</sub> -H <sub>29</sub> | -9.9948  | 0.0139   |
|                                  |        |        | H <sub>19</sub> -C <sub>18</sub> -C <sub>20</sub>     | 120.4205 | 119.2934 | C <sub>10</sub> -O <sub>13</sub> -O <sub>26</sub> -C <sub>15</sub> | 65.2125  | 0.0093   |
|                                  |        |        | C <sub>18</sub> -C <sub>20</sub> -C <sub>21</sub>     | 121.1985 | 120.8909 | C <sub>23</sub> -C <sub>15</sub> -C <sub>16</sub> -H <sub>17</sub> | -178.446 | -180.004 |
|                                  |        |        | C <sub>18</sub> -C <sub>20</sub> -N <sub>25</sub>     | 119.6131 | 119.5235 | C <sub>23</sub> -C <sub>15</sub> -C <sub>16</sub> -C <sub>18</sub> | 1.6343   | -0.0049  |
|                                  |        |        | C <sub>21</sub> -C <sub>20</sub> -N <sub>25</sub>     | 119.1859 | 119.5856 | O <sub>26</sub> -C <sub>15</sub> -C <sub>16</sub> -H <sub>17</sub> | 2.4709   | -0.003   |
|                                  |        |        | C <sub>20</sub> -C <sub>21</sub> -H <sub>22</sub>     | 120.2803 | 119.2221 | O <sub>26</sub> -C <sub>15</sub> -C <sub>16</sub> -C <sub>18</sub> | -177.448 | 179.9961 |
|                                  |        |        | C <sub>20</sub> -C <sub>21</sub> -C <sub>23</sub>     | 119.4079 | 119.8506 | C <sub>16</sub> -C <sub>15</sub> -C <sub>23</sub> -C <sub>21</sub> | -2.1391  | 0.0038   |
|                                  |        |        | H <sub>22</sub> -C <sub>21</sub> -C <sub>23</sub>     | 120.3117 | 120.9273 | C <sub>16</sub> -C <sub>15</sub> -C <sub>23</sub> -H <sub>24</sub> | 177.878  | 179.9999 |
|                                  |        |        | C <sub>15</sub> -C <sub>23</sub> -C <sub>21</sub>     | 120.3083 | 119.9235 | O <sub>26</sub> -C <sub>15</sub> -C <sub>23</sub> -C <sub>21</sub> | 176.888  | -179.997 |
|                                  |        |        | C <sub>15</sub> -C <sub>23</sub> -H <sub>24</sub>     | 119.8527 | 119.7967 | O <sub>26</sub> -C <sub>15</sub> -C <sub>23</sub> -H <sub>24</sub> | -3.0941  | -0.0011  |
|                                  |        |        | C <sub>21</sub> -C <sub>23</sub> -H <sub>24</sub>     | 119.8389 | 120.2798 | C <sub>16</sub> -C <sub>15</sub> -O <sub>26</sub> -H <sub>29</sub> | 172.6174 | 179.9557 |
|                                  |        |        | C <sub>20</sub> -N <sub>25</sub> -O <sub>27</sub>     | 118.1174 | 118.1174 | C <sub>23</sub> -C <sub>15</sub> -O <sub>26</sub> -H <sub>29</sub> | -6.4256  | -0.0432  |
|                                  |        |        | C <sub>20</sub> -N <sub>25</sub> -O <sub>28</sub>     | 118.6440 | 118.1429 | C <sub>15</sub> -C <sub>16</sub> -C <sub>18</sub> -H <sub>19</sub> | 179.445  | -179.997 |
|                                  |        |        | O <sub>27</sub> -N <sub>25</sub> -O <sub>28</sub>     | 122.8478 | 123.7397 | C <sub>15</sub> -C <sub>16</sub> -C <sub>18</sub> -C <sub>20</sub> | -0.5329  | 0.0021   |
|                                  |        |        | C <sub>15</sub> -O <sub>26</sub> -<br>H <sub>29</sub> | 109.4443 | 112.909  | H <sub>17</sub> -C <sub>16</sub> -C <sub>18</sub> -H <sub>19</sub> | -0.4743  | 0.0018   |
|                                  |        |        |                                                       |          |          | H <sub>17</sub> -C <sub>16</sub> -C <sub>18</sub> -C <sub>20</sub> | 179.547  | -179.999 |
|                                  |        |        |                                                       |          |          | C <sub>16</sub> -C <sub>18</sub> -C <sub>20</sub> -C <sub>21</sub> | -0.0857  | 0.0017   |
|                                  |        |        |                                                       |          |          | C <sub>16</sub> -C <sub>18</sub> -C <sub>20</sub> -N <sub>25</sub> | 179.3357 | 180.0013 |
|                                  |        |        |                                                       |          |          | H <sub>19</sub> -C <sub>18</sub> -C <sub>20</sub> -C <sub>21</sub> | 179.936  | 180.0011 |
|                                  |        |        |                                                       |          |          | H <sub>19</sub> -C <sub>18</sub> -C <sub>20</sub> -N <sub>25</sub> | -0.6424  | 0.0007   |
|                                  |        |        |                                                       |          |          | C <sub>18</sub> -C <sub>20</sub> -C <sub>21</sub> -H <sub>22</sub> | 179.590  | -180     |
|                                  |        |        |                                                       |          |          | C <sub>18</sub> -C <sub>20</sub> -C <sub>21</sub> -C <sub>23</sub> | -0.4180  | -0.0028  |
|                                  |        |        |                                                       |          |          | N <sub>25</sub> -C <sub>20</sub> -C <sub>21</sub> -H <sub>22</sub> | 0.1665   | 0.001    |
|                                  |        |        |                                                       |          |          | N <sub>25</sub> -C <sub>20</sub> -C <sub>21</sub> -C <sub>23</sub> | -179.841 | 179.9977 |
|                                  |        |        |                                                       |          |          | C <sub>18</sub> -C <sub>20</sub> -N <sub>25</sub> -O <sub>27</sub> | -1.3651  | 0.0238   |
|                                  |        |        |                                                       |          |          | C <sub>18</sub> -C <sub>20</sub> -N <sub>25</sub> -O <sub>28</sub> | 178.095  | -179.975 |



|  |  |  |  |  |  |                                                                    |          |          |
|--|--|--|--|--|--|--------------------------------------------------------------------|----------|----------|
|  |  |  |  |  |  | C <sub>21</sub> -C <sub>20</sub> -N <sub>25</sub> -O <sub>27</sub> | 178.068  | -179.977 |
|  |  |  |  |  |  | C <sub>21</sub> -C <sub>20</sub> -N <sub>25</sub> -O <sub>28</sub> | -2.4711  | 0.0248   |
|  |  |  |  |  |  | C <sub>20</sub> -C <sub>21</sub> -C <sub>23</sub> -C <sub>15</sub> | 1.5379   | -0.0001  |
|  |  |  |  |  |  | C <sub>20</sub> -C <sub>21</sub> -C <sub>23</sub> -H <sub>24</sub> | -178.479 | -179.996 |
|  |  |  |  |  |  | H <sub>22</sub> -C <sub>21</sub> -C <sub>23</sub> -C <sub>15</sub> | -178.470 | -180.003 |
|  |  |  |  |  |  | H <sub>22</sub> -C <sub>21</sub> -C <sub>23</sub> -H <sub>24</sub> | 1.5117   | 0.0005   |

**Table.S2. The comparison of bond lengths, bond angles, dihedral angle for P2C4N by the single crystal XRD and DFT method**

| Donor(j)                                     | Acceptor                                        |         | E <sup>(2)</sup><br>(kcal/mol) | E(j)-E(j) | F(i,j) |
|----------------------------------------------|-------------------------------------------------|---------|--------------------------------|-----------|--------|
| $\sigma$ (C <sub>1</sub> - C <sub>8</sub> )  | $\sigma^*$ (C <sub>1</sub> - C <sub>10</sub> )  | 1.96906 | 0.96                           | 1.09      | 0.03   |
| $\sigma$ (C <sub>1</sub> - C <sub>8</sub> )  | $\sigma^*$ (C <sub>1</sub> - N <sub>11</sub> )  |         | 0.79                           | 1.2       | 0.028  |
| $\sigma$ (C <sub>1</sub> - C <sub>8</sub> )  | $\sigma^*$ (C <sub>6</sub> - H <sub>7</sub> )   |         | 2.7                            | 1.14      | 0.05   |
| $\sigma$ (C <sub>1</sub> - C <sub>8</sub> )  | $\sigma^*$ (C <sub>6</sub> - C <sub>8</sub> )   |         | 1.59                           | 1.26      | 0.04   |
| $\sigma$ (C <sub>1</sub> - C <sub>8</sub> )  | $\sigma^*$ (C <sub>8</sub> - H <sub>9</sub> )   |         | 0.88                           | 1.16      | 0.029  |
| $\sigma$ (C <sub>1</sub> - C <sub>8</sub> )  | $\sigma^*$ (N <sub>11</sub> - H <sub>14</sub> ) |         | 2.54                           | 1.1       | 0.048  |
| $\sigma$ (C <sub>1</sub> - C <sub>10</sub> ) | $\sigma^*$ (C <sub>1</sub> - C <sub>8</sub> )   |         | 1.18                           | 1.12      | 0.033  |
| $\sigma$ (C <sub>1</sub> - C <sub>10</sub> ) | $\sigma^*$ (C <sub>1</sub> - C <sub>10</sub> )  | 1.96906 | 0.82                           | 0.95      | 0.026  |
| $\sigma$ (C <sub>1</sub> - C <sub>10</sub> ) | $\sigma^*$ (C <sub>2</sub> - N <sub>11</sub> )  |         | 6.39                           | 1.04      | 0.073  |
| $\sigma$ (C <sub>1</sub> - C <sub>10</sub> ) | $\sigma^*$ (C <sub>6</sub> - C <sub>8</sub> )   |         | 2.9                            | 1.12      | 0.051  |
| $\sigma$ (C <sub>1</sub> - C <sub>10</sub> ) | $\sigma^*$ (N <sub>11</sub> - H <sub>14</sub> ) |         | 0.98                           | 0.96      | 0.028  |
| $\sigma$ (C <sub>1</sub> - N <sub>11</sub> ) | $\sigma^*$ (C <sub>1</sub> - C <sub>8</sub> )   |         | 1.21                           | 1.4       | 0.037  |
| $\sigma$ (C <sub>1</sub> - N <sub>11</sub> ) | $\sigma^*$ (C <sub>2</sub> - H <sub>3</sub> )   |         | 1.71                           | 1.25      | 0.041  |
| $\sigma$ (C <sub>1</sub> - N <sub>11</sub> ) | $\sigma^*$ (C <sub>2</sub> - N <sub>11</sub> )  |         | 1.58                           | 1.32      | 0.041  |
| $\sigma$ (C <sub>1</sub> - N <sub>11</sub> ) | $\sigma^*$ (C <sub>8</sub> - H <sub>9</sub> )   |         | 1.68                           | 1.3       | 0.042  |
| $\sigma$ (C <sub>1</sub> - N <sub>11</sub> ) | $\sigma^*$ (C <sub>10</sub> - O <sub>13</sub> ) |         | 0.75                           | 1.49      | 0.03   |
| $\sigma$ (C <sub>1</sub> - N <sub>11</sub> ) | $\sigma^*$ (N <sub>11</sub> - H <sub>14</sub> ) |         | 0.7                            | 1.24      | 0.026  |
| $\sigma$ (C <sub>1</sub> - N <sub>11</sub> ) | $\pi^*$ (C <sub>1</sub> - N <sub>11</sub> )     |         | 0.52                           | 0.33      | 0.013  |
| $\sigma$ (C <sub>1</sub> - N <sub>11</sub> ) | $\pi^*$ (C <sub>2</sub> - C <sub>4</sub> )      |         | 22.94                          | 0.36      | 0.083  |
| $\sigma$ (C <sub>1</sub> - N <sub>11</sub> ) | $\pi^*$ (C <sub>10</sub> - O <sub>13</sub> )    |         | 5.36                           | 0.42      | 0.045  |
| $\sigma$ (C <sub>2</sub> - H <sub>3</sub> )  | $\sigma^*$ (C <sub>1</sub> - N <sub>11</sub> )  |         | 6.21                           | 1.03      | 0.072  |
| $\sigma$ (C <sub>2</sub> - H <sub>3</sub> )  | $\sigma^*$ (C <sub>2</sub> - C <sub>4</sub> )   |         | 0.64                           | 1.08      | 0.023  |
| $\sigma$ (C <sub>2</sub> - H <sub>3</sub> )  | $\sigma^*$ (C <sub>4</sub> - C <sub>6</sub> )   |         | 3.7                            | 1.07      | 0.056  |
| $\sigma$ (C <sub>2</sub> - H <sub>3</sub> )  | $\sigma^*$ (N <sub>11</sub> - H <sub>14</sub> ) |         | 0.51                           | 0.93      | 0.02   |
| $\sigma$ (C <sub>2</sub> - C <sub>4</sub> )  | $\sigma^*$ (C <sub>2</sub> - H <sub>3</sub> )   |         | 0.96                           | 1.13      | 0.029  |
| $\sigma$ (C <sub>2</sub> - C <sub>4</sub> )  | $\sigma^*$ (C <sub>2</sub> - N <sub>11</sub> )  |         | 0.87                           | 1.2       | 0.029  |
| $\sigma$ (C <sub>2</sub> - C <sub>4</sub> )  | $\sigma^*$ (C <sub>4</sub> - H <sub>5</sub> )   |         | 0.72                           | 1.16      | 0.026  |
| $\sigma$ (C <sub>2</sub> - C <sub>4</sub> )  | $\sigma^*$ (C <sub>4</sub> - C <sub>6</sub> )   |         | 1.45                           | 1.25      | 0.038  |

|                      |                        |  |        |      |       |
|----------------------|------------------------|--|--------|------|-------|
| $\sigma$ (C2 - C4)   | $\sigma^*$ (C6 - H7)   |  | 2.43   | 1.16 | 0.048 |
| $\sigma$ (C2 - C4)   | $\sigma^*$ (N11 - H14) |  | 3.35   | 1.12 | 0.055 |
| $\pi$ (C2 - C4)      | $\pi^*$ (C1 - N11)     |  | 13.45  | 0.25 | 0.054 |
| $\pi$ (C2 - C4)      | $\pi^*$ (C2 - C4)      |  | 0.97   | 0.29 | 0.015 |
| $\sigma$ (C2 - N11)  | $\sigma^*$ (C1 - C10)  |  | 1.6    | 1.25 | 0.041 |
| $\sigma$ (C2 - N11)  | $\sigma^*$ (C1 - N11)  |  | 1.84   | 1.35 | 0.045 |
| $\sigma$ (C2 - N11)  | $\sigma^*$ (C2 - C4)   |  | 1.1    | 1.4  | 0.035 |
| $\sigma$ (C2 - N11)  | $\sigma^*$ (C4 - H5)   |  | 1.62   | 1.3  | 0.041 |
| $\sigma$ (C2 - N11)  | $\sigma^*$ (N11 - H14) |  | 0.57   | 1.26 | 0.024 |
| $\sigma$ (C4 - H5)   | $\sigma^*$ (C2 - N11)  |  | 4.83   | 0.99 | 0.062 |
| $\sigma$ (C4 - H5)   | $\sigma^*$ (C6 - C8)   |  | 4.13   | 1.07 | 0.059 |
| $\sigma$ (C4 - C6)   | $\sigma^*$ (C2 - H3)   |  | 2.81   | 1.11 | 0.05  |
| $\sigma$ (C4 - C6)   | $\sigma^*$ (C2 - C4)   |  | 1.45   | 1.24 | 0.038 |
| $\sigma$ (C4 - C6)   | $\sigma^*$ (C4 - H5)   |  | 0.89   | 1.14 | 0.028 |
| $\sigma$ (C4 - C6)   | $\sigma^*$ (C6 - H7)   |  | 0.59   | 1.14 | 0.023 |
| $\sigma$ (C4 - C6)   | $\sigma^*$ (C6 - C8)   |  | 1.45   | 1.26 | 0.038 |
| $\sigma$ (C4 - C6)   | $\sigma^*$ (C8 - H9)   |  | 2.65   | 1.16 | 0.05  |
| $\sigma$ (C6 - H7)   | $\sigma^*$ (C1 - C8)   |  | 4.46   | 1.07 | 0.062 |
| $\sigma$ (C6 - H7)   | $\sigma^*$ (C2 - C4)   |  | 4.43   | 1.05 | 0.061 |
| $\sigma$ (C6 - H7)   | $\sigma^*$ (C4 - H5)   |  | 0.52   | 0.95 | 0.02  |
| $\sigma$ (C6 - C8)   | $\sigma^*$ (C1 - C8)   |  | 1.56   | 1.26 | 0.04  |
| $\sigma$ (C6 - C8)   | $\sigma^*$ (C1 - C10)  |  | 3.56   | 1.09 | 0.057 |
| $\sigma$ (C6 - C8)   | $\sigma^*$ (C4 - H5)   |  | 2.58   | 1.14 | 0.048 |
| $\sigma$ (C6 - C8)   | $\sigma^*$ (C4 - C6)   |  | 1.45   | 1.23 | 0.038 |
| $\sigma$ (C6 - C8)   | $\sigma^*$ (C6 - H7)   |  | 0.69   | 1.14 | 0.025 |
| $\sigma$ (C6 - C8)   | $\sigma^*$ (C8 - H9)   |  | 0.93   | 1.16 | 0.029 |
| $\sigma$ (C8 - H9)   | $\sigma^*$ (C1 - C8)   |  | 0.7    | 1.05 | 0.024 |
| $\sigma$ (C8 - H9)   | $\sigma^*$ (C1 - N11)  |  | 6      | 0.99 | 0.069 |
| $\sigma$ (C8 - H9)   | $\sigma^*$ (C4 - C6)   |  | 4.37   | 1.03 | 0.06  |
| $\sigma$ (C8 - H9)   | $\sigma^*$ (C6 - H7)   |  | 0.54   | 0.93 | 0.02  |
| $\sigma$ (C10 - O12) | $\sigma^*$ (C1 - C8)   |  | 1.68   | 1.49 | 0.045 |
| $\sigma$ (C10 - O12) | $\sigma^*$ (C10 - O13) |  | 1.96   | 1.58 | 0.05  |
| $\sigma$ (C10 - O13) | $\sigma^*$ (C1 - N11)  |  | 1.12   | 1.43 | 0.036 |
| $\sigma$ (C10 - O13) | $\sigma^*$ (C10 - O12) |  | 2.14   | 1.57 | 0.052 |
| $\sigma$ (C10 - O13) | $\pi^*$ (C1 - N11)     |  | 6.39   | 0.27 | 0.042 |
| $\sigma$ (C10 - O13) | $\pi^*$ (C10 - O13)    |  | 1.74   | 0.36 | 0.025 |
| $\sigma$ (N11 - H14) | $\sigma^*$ (C1 - C8)   |  | 4.92   | 1.2  | 0.069 |
| $\sigma$ (N11 - H14) | $\sigma^*$ (C1 - C10)  |  | 0.55   | 1.03 | 0.022 |
| $\sigma$ N 11 - H 14 | $\sigma^*$ (C1 - N11)  |  | 0.73   | 1.14 | 0.026 |
| $\sigma$ N 11 - H 14 | $\sigma^*$ (C2 - H3)   |  | 0.88   | 1.05 | 0.027 |
| $\sigma$ N 11 - H 14 | $\sigma^*$ (C2 - C4)   |  | 3.05   | 1.19 | 0.054 |
| $n_1C_8$             | $\pi^*$ (C1 - N11)     |  | 160.26 | 0.09 | 0.126 |
| $n_1C_8$             | $\pi^*$ (C10 - O13)    |  | 0.56   | 0.17 | 0.011 |
| $n_1O_{12}$          | $\sigma^*$ (C1 - C10)  |  | 2.79   | 1.03 | 0.049 |

|                     |               |  |        |      |       |
|---------------------|---------------|--|--------|------|-------|
| n <sub>1</sub> O 12 | σ*(C10 - O13) |  | 2.67   | 1.29 | 0.053 |
| n <sub>1</sub> O 12 | σ*(N11 - H14) |  | 1.24   | 1.04 | 0.032 |
| LP ( 2) O 12        | σ*(C1 - C8)   |  | 0.95   | 0.74 | 0.025 |
| LP ( 2) O 12        | σ*(C1 - C10)  |  | 21.77  | 0.58 | 0.1   |
| LP ( 2) O 12        | σ*(C2 - N11)  |  | 0.8    | 0.66 | 0.021 |
| LP ( 2) O 12        | σ*(C10 - O13) |  | 19.78  | 0.83 | 0.118 |
| LP ( 2) O 12        | σ*(N11 - H14) |  | 6.26   | 0.58 | 0.055 |
| LP ( 3) O 12        | π*(C10 - O13) |  | 120.36 | 0.25 | 0.154 |
| n <sub>1</sub> O 13 | σ*(C1 - C10)  |  | 0.55   | 1.01 | 0.022 |
| n <sub>1</sub> O 13 | σ*(C10 - O12) |  | 6.9    | 1.26 | 0.084 |
| LP ( 2) O 13        | σ*(C1 - C10)  |  | 25.28  | 0.59 | 0.109 |
| LP ( 2) O 13        | σ*(C1 - N11)  |  | 1.14   | 0.7  | 0.026 |
| LP ( 2) O 13        | σ*(C10 - O12) |  | 14.29  | 0.84 | 0.1   |
| π*(C1 - N11)        | π*(C2 - C4)   |  | 69.45  | 0.03 | 0.069 |
| π*(C1 - N11)        | π*(C10 - O13) |  | 35.4   | 0.09 | 0.074 |
| σ(C1 - C10)         | σ*(C23 - H24) |  | 0.09   | 1.11 | 0.009 |
| σ(C1 - C10)         | σ*(O26 - H29) |  | 0.32   | 1.09 | 0.017 |
| n <sub>1</sub> O 12 | σ*(C23 - H24) |  | 0.35   | 1.19 | 0.018 |
| LP ( 2) O 12        | σ*(C23 - H24) |  | 1.1    | 0.73 | 0.026 |
| n <sub>1</sub> O 13 | σ*(C15 - O26) |  | 0.11   | 1.12 | 0.01  |
| n <sub>1</sub> O 13 | σ*(O26 - H29) |  | 6.46   | 1.14 | 0.077 |
| LP ( 2) O 13        | σ*(C15 - O26) |  | 0.1    | 0.7  | 0.008 |
| LP ( 2) O 13        | σ*(O26 - H29) |  | 15.25  | 0.73 | 0.096 |
| LP ( 2) O 26        | π*(C10 - O13) |  | 0.05   | 0.28 | 0.004 |
| σ(C15 - C16)        | σ*(C15 - C23) |  | 2.14   | 1.22 | 0.046 |
| σ(C15 - C16)        | σ*(C16 - H17) |  | 0.68   | 1.11 | 0.025 |
| σ(C15 - C16)        | σ*(C16 - C18) |  | 1.9    | 1.25 | 0.044 |
| σ(C15 - C16)        | σ*(C18 - H19) |  | 2.71   | 1.13 | 0.049 |
| σ(C15 - C16)        | σ*(C23 - H24) |  | 2.4    | 1.14 | 0.047 |
| σ(C15 - C16)        | σ*(O26 - H29) |  | 2.29   | 1.12 | 0.045 |
| σ(C15 - C23)        | σ*(C15 - C16) |  | 2.32   | 1.22 | 0.048 |
| σ(C15 - C23)        | σ*(C16 - H17) |  | 2.29   | 1.12 | 0.045 |
| σ(C15 - C23)        | σ*(C21 - H22) |  | 2.66   | 1.13 | 0.049 |
| σ(C15 - C23)        | σ*(C21 - C23) |  | 2.03   | 1.26 | 0.045 |
| σ(C15 - C23)        | σ*(C23 - H24) |  | 0.81   | 1.14 | 0.027 |
| σ(C15 - O26)        | σ*(C15 - C16) |  | 0.6    | 1.44 | 0.026 |
| σ(C15 - O26)        | σ*(C15 - C23) |  | 0.78   | 1.45 | 0.03  |
| σ(C15 - O26)        | σ*(C16 - C18) |  | 1.57   | 1.48 | 0.043 |
| σ(C15 - O26)        | σ*(C21 - C23) |  | 1.31   | 1.48 | 0.039 |
| σ(C16 - H17)        | σ*(C15 - C23) |  | 4.3    | 1.04 | 0.06  |
| σ(C16 - H17)        | σ*(C15 - O26) |  | 0.75   | 0.91 | 0.023 |
| σ(C16 - H17)        | σ*(C16 - C18) |  | 0.63   | 1.08 | 0.023 |
| σ(C16 - H17)        | σ*(C18 - C20) |  | 4.5    | 1.05 | 0.061 |
| σ(C16 - C18)        | σ*(C15 - C16) |  | 1.46   | 1.23 | 0.038 |

|                      |                        |  |      |      |       |
|----------------------|------------------------|--|------|------|-------|
| $\sigma$ (C16 - C18) | $\sigma^*$ (C15 - O26) |  | 3.42 | 1.11 | 0.055 |
| $\sigma$ (C16 - C18) | $\sigma^*$ (C16 - H17) |  | 0.98 | 1.13 | 0.03  |
| $\sigma$ (C16 - C18) | $\sigma^*$ (C18 - H19) |  | 0.92 | 1.15 | 0.029 |
| $\sigma$ (C16 - C18) | $\sigma^*$ (C18 - C20) |  | 2.12 | 1.24 | 0.046 |
| $\sigma$ (C16 - C18) | $\sigma^*$ (C20 - N25) |  | 4.62 | 1    | 0.062 |
| $\sigma$ (C18 - H19) | $\sigma^*$ (C15 - C16) |  | 4.57 | 1.04 | 0.061 |
| $\sigma$ (C18 - H19) | $\sigma^*$ (C16 - H17) |  | 0.52 | 0.94 | 0.02  |
| $\sigma$ (C18 - H19) | $\sigma^*$ (C16 - C18) |  | 0.65 | 1.08 | 0.024 |
| $\sigma$ (C18 - H19) | $\sigma^*$ (C20 - C21) |  | 4.96 | 1.05 | 0.065 |
| $\sigma$ (C18 - H19) | $\sigma^*$ (C20 - N25) |  | 0.66 | 0.81 | 0.021 |
| $\sigma$ (C18 - C20) | $\sigma^*$ (C16 - H17) |  | 2.84 | 1.13 | 0.051 |
| $\sigma$ (C18 - C20) | $\sigma^*$ (C16 - C18) |  | 1.83 | 1.27 | 0.043 |
| $\sigma$ (C18 - C20) | $\sigma^*$ (C18 - H19) |  | 0.9  | 1.14 | 0.029 |
| $\sigma$ (C18 - C20) | $\sigma^*$ (C20 - C21) |  | 3.7  | 1.24 | 0.06  |
| $\sigma$ (C18 - C20) | $\sigma^*$ (C21 - H22) |  | 2.33 | 1.14 | 0.046 |
| $\sigma$ (C18 - C20) | $\sigma^*$ (N25 - O28) |  | 2.46 | 1.13 | 0.047 |
| $\sigma$ (C20 - C21) | $\sigma^*$ (C18 - H19) |  | 2.35 | 1.14 | 0.046 |
| $\sigma$ (C20 - C21) | $\sigma^*$ (C18 - C20) |  | 3.68 | 1.24 | 0.06  |
| $\sigma$ (C20 - C21) | $\sigma^*$ (C21 - H22) |  | 0.89 | 1.14 | 0.028 |
| $\sigma$ (C20 - C21) | $\sigma^*$ (C21 - C23) |  | 1.78 | 1.27 | 0.043 |
| $\sigma$ (C20 - C21) | $\sigma^*$ (C23 - H24) |  | 2.68 | 1.15 | 0.05  |
| $\sigma$ (C20 - C21) | $\sigma^*$ (N25 - O27) |  | 2.44 | 1.13 | 0.047 |
| $\sigma$ (C20 - N25) | $\sigma^*$ (C16 - C18) |  | 1.73 | 1.35 | 0.043 |
| $\sigma$ (C20 - N25) | $\sigma^*$ (C18 - C20) |  | 0.61 | 1.33 | 0.025 |
| $\sigma$ (C20 - N25) | $\sigma^*$ (C20 - C21) |  | 0.63 | 1.33 | 0.026 |
| $\sigma$ (C20 - N25) | $\sigma^*$ (C21 - C23) |  | 1.76 | 1.35 | 0.044 |
| $\sigma$ (C21 - H22) | $\sigma^*$ (C15 - C23) |  | 4.65 | 1.04 | 0.062 |
| $\sigma$ (C21 - H22) | $\sigma^*$ (C18 - C20) |  | 5.02 | 1.05 | 0.065 |
| $\sigma$ (C21 - H22) | $\sigma^*$ (C20 - N25) |  | 0.68 | 0.81 | 0.021 |
| $\sigma$ (C21 - H22) | $\sigma^*$ (C21 - C23) |  | 0.64 | 1.08 | 0.024 |
| $\sigma$ (C21 - H22) | $\sigma^*$ (C23 - H24) |  | 0.53 | 0.96 | 0.02  |
| $\sigma$ (C21 - C23) | $\sigma^*$ (C15 - C23) |  | 1.55 | 1.23 | 0.039 |
| $\sigma$ (C21 - C23) | $\sigma^*$ (C15 - O26) |  | 4.18 | 1.1  | 0.061 |
| $\sigma$ (C21 - C23) | $\sigma^*$ (C20 - C21) |  | 2.13 | 1.24 | 0.046 |
| $\sigma$ (C21 - C23) | $\sigma^*$ (C20 - N25) |  | 4.63 | 1    | 0.062 |
| $\sigma$ (C21 - C23) | $\sigma^*$ (C21 - H22) |  | 0.9  | 1.14 | 0.029 |
| $\sigma$ (C21 - C23) | $\sigma^*$ (C23 - H24) |  | 1.08 | 1.15 | 0.032 |
| $\sigma$ (C23 - H24) | $\sigma^*$ (C15 - C16) |  | 4.17 | 1.03 | 0.059 |
| $\sigma$ (C23 - H24) | $\sigma^*$ (C15 - O26) |  | 0.63 | 0.91 | 0.021 |
| $\sigma$ (C23 - H24) | $\sigma^*$ (C20 - C21) |  | 4.3  | 1.05 | 0.06  |
| $\sigma$ (C23 - H24) | $\sigma^*$ (C21 - H22) |  | 0.51 | 0.95 | 0.02  |
| $\sigma$ (C23 - H24) | $\sigma^*$ (C21 - C23) |  | 0.78 | 1.07 | 0.026 |
| $\sigma$ (N25 - O27) | $\sigma^*$ (C20 - C21) |  | 1.14 | 1.6  | 0.038 |
| $\sigma$ (N25 - O27) | $\sigma^*$ (C20 - N25) |  | 0.56 | 1.35 | 0.025 |

|                      |                         |  |        |      |       |
|----------------------|-------------------------|--|--------|------|-------|
| $\sigma$ (N25 - O27) | $\pi^*$ (N25 - O27)     |  | 7.82   | 0.32 | 0.054 |
| $\sigma$ (N25 - O28) | $\sigma^*$ (C18 - C20)  |  | 1.13   | 1.59 | 0.038 |
| $\sigma$ (N25 - O28) | $\sigma^*$ (C20 - N25)  |  | 0.56   | 1.35 | 0.025 |
| $\sigma$ (O26 - H29) | $\sigma^*$ (C15 - C16)  |  | 5.33   | 1.26 | 0.073 |
| $n_1$ C 20           | $\pi^*$ ( C16 - C18)    |  | 64.74  | 0.16 | 0.108 |
| $n_1$ C 20           | $\pi^*$ (C21 - C23)     |  | 65.27  | 0.16 | 0.108 |
| $n_1$ C 20           | $\pi^*$ (N25 - O27)     |  | 757.14 | 0.01 | 0.09  |
| $n_1$ O 26           | $\sigma^*$ (C15 - C16)  |  | 0.63   | 1.08 | 0.023 |
| $n_1$ O 26           | $\sigma^*$ (C15 - C23)  |  | 8.85   | 1.09 | 0.088 |
| $n_1$ O 27           | $\sigma^*$ (C20 - N 25) |  | 4.77   | 1.07 | 0.065 |
| $n_1$ O 27           | $\sigma^*$ (N 25 - O28) |  | 2.68   | 1.21 | 0.051 |
| LP ( 2) O 27         | $\sigma^*$ (C16 - C18)  |  | 0.67   | 0.84 | 0.022 |
| LP ( 2) O 27         | $\sigma^*$ (C20 - C21)  |  | 0.82   | 0.81 | 0.024 |
| LP ( 2) O 27         | $\sigma^*$ (C20 - N25)  |  | 14.22  | 0.57 | 0.08  |
| LP ( 2) O 27         | $\sigma^*$ (N25 - O28)  |  | 19.33  | 0.7  | 0.105 |
| $n_1$ O 28           | $\sigma^*$ (C20 - N25)  |  | 4.77   | 1.07 | 0.065 |
| $n_1$ O 28           | $\sigma^*$ (25 - O27)   |  | 2.68   | 1.21 | 0.051 |
| LP ( 2) O 28         | $\sigma^*$ (C18 - C20)  |  | 0.82   | 0.81 | 0.024 |
| LP ( 2) O 28         | $\sigma^*$ (C20 - N25)  |  | 14.23  | 0.57 | 0.081 |
| LP ( 2) O 28         | $\sigma^*$ (C21 - C23)  |  | 0.67   | 0.84 | 0.022 |
| LP ( 2) O 28         | $\sigma^*$ (N25 - O27)  |  | 19.32  | 0.7  | 0.105 |
| LP ( 3) O 28         | $\pi^*$ (N25 - O27)     |  | 159.61 | 0.14 | 0.139 |

**Table.S3. Second-order perturbation theory analysis of Fock matrix in NBO basis**

| RCP | Name | Atom count | $\rho$   | $\nabla^2\rho$ |
|-----|------|------------|----------|----------------|
| 1   | RCP1 | 6          | 0.026021 | 0.167904       |
| 2   | RCP2 | 5          | 0.029197 | 0.176551       |
| 3   | RCP3 | 8          | 0.004723 | 0.017498       |
| 4   | RCP4 | 6          | 0.024176 | 0.148334       |

**Table.S4. Characteristics of the ring CPs of P2C4N**

| BCP | Name  | Atoms                             | $\rho$   | $\nabla^2\rho$ | Ellipticity | K        |
|-----|-------|-----------------------------------|----------|----------------|-------------|----------|
| 1   | BCP1  | C <sub>10</sub> - O <sub>12</sub> | 0.395982 | -0.59981       | 0.110473    | 0.673827 |
| 2   | BCP2  | C <sub>1</sub> - N <sub>11</sub>  | 0.333354 | -0.76741       | 0.049919    | 0.509987 |
| 3   | BCP3  | C <sub>2</sub> - C <sub>4</sub>   | 0.333136 | -1.13811       | 0.220928    | 0.399496 |
| 4   | BCP4  | C <sub>2</sub> - N <sub>11</sub>  | 0.332658 | -0.79888       | 0.129743    | 0.50324  |
| 5   | BCP5  | C <sub>2</sub> - H <sub>3</sub>   | 0.301899 | -1.24958       | 0.023183    | 0.346448 |
| 6   | BCP6  | C <sub>4</sub> - C <sub>6</sub>   | 0.320136 | -1.05694       | 0.162463    | 0.365986 |
| 7   | BCP7  | C <sub>4</sub> - H <sub>5</sub>   | 0.297706 | -1.2081        | 0.01348     | 0.340255 |
| 8   | BCP8  | C <sub>10</sub> - O <sub>13</sub> | 0.398189 | -0.5929        | 0.122627    | 0.681409 |
| 9   | BCP9  | C <sub>1</sub> - C <sub>8</sub>   | 0.330857 | -1.12936       | 0.168437    | 0.391851 |
| 10  | BCP10 | C <sub>1</sub> - C <sub>10</sub>  | 0.245602 | -0.61602       | 0.101877    | 0.212643 |
| 11  | BCP11 | C <sub>6</sub> - H <sub>7</sub>   | 0.298513 | -1.21813       | 0.002764    | 0.340604 |
| 12  | BCP12 | C <sub>6</sub> - C <sub>8</sub>   | 0.325906 | -1.09151       | 0.171019    | 0.379915 |
| 13  | BCP13 | C <sub>8</sub> - H <sub>9</sub>   | 0.299457 | -1.22968       | 0.01171     | 0.342127 |
| 14  | BCP14 | N <sub>11</sub> - H <sub>14</sub> | 0.326188 | -1.94922       | 0.019127    | 0.53139  |
| 15  | BCP15 | O <sub>12</sub> - H <sub>24</sub> | 0.0101   | 0.035156       | 0.003142    | -0.00163 |
| 16  | BCP16 | O <sub>12</sub> - H <sub>14</sub> | 0.033106 | 0.124351       | 0.365731    | -0.00201 |
| 17  | BCP17 | O <sub>13</sub> - H <sub>29</sub> | 0.043442 | 0.098612       | 0.007538    | 0.008438 |
| 18  | BCP18 | O <sub>26</sub> - H <sub>29</sub> | 0.338109 | -2.50664       | 0.013705    | 0.694787 |
| 19  | BCP19 | C <sub>15</sub> - C <sub>16</sub> | 0.320025 | -1.0571        | 0.207141    | 0.364347 |
| 20  | BCP20 | C <sub>16</sub> - H <sub>17</sub> | 0.29373  | -1.17047       | 0.023069    | 0.33437  |
| 21  | BCP21 | C <sub>16</sub> - C <sub>18</sub> | 0.3284   | -1.09963       | 0.218135    | 0.387859 |
| 22  | BCP22 | C <sub>15</sub> - C <sub>23</sub> | 0.317952 | -1.03782       | 0.20131     | 0.361363 |
| 23  | BCP23 | C <sub>18</sub> - H <sub>19</sub> | 0.298217 | -1.21177       | 0.011131    | 0.34122  |
| 24  | BCP24 | C <sub>18</sub> - C <sub>20</sub> | 0.3221   | -1.062         | 0.202924    | 0.37104  |
| 25  | BCP25 | C <sub>23</sub> - H <sub>24</sub> | 0.295329 | -1.18289       | 0.019802    | 0.335044 |

|    |       |                                   |          |          |          |          |
|----|-------|-----------------------------------|----------|----------|----------|----------|
| 26 | BCP26 | C <sub>21</sub> - C <sub>23</sub> | 0.326524 | -1.08666 | 0.210652 | 0.383588 |
| 27 | BCP27 | C <sub>20</sub> - N <sub>25</sub> | 0.269117 | -0.73517 | 0.193812 | 0.327013 |
| 28 | BCP28 | N <sub>25</sub> - O <sub>27</sub> | 0.503162 | -1.11301 | 0.112268 | 0.658052 |
| 29 | BCP29 | C <sub>20</sub> - C <sub>21</sub> | 0.323036 | -1.06789 | 0.204425 | 0.373344 |
| 30 | BCP30 | N <sub>25</sub> - O <sub>28</sub> | 0.503045 | -1.11222 | 0.112189 | 0.657719 |
| 31 | BCP31 | C <sub>21</sub> - H <sub>22</sub> | 0.298263 | -1.21199 | 0.011194 | 0.341215 |
| 32 | BCP32 | C <sub>15</sub> - O <sub>26</sub> | 0.313884 | -0.59365 | 0.019113 | 0.48432  |

**Table.S5. Characteristics of the bond CPs of P2C4N**
